# Supplementary material
Source: PubMed Central journal article supplement (PMC1200315)
Supplement: pnas_0506426102_1.pdf [file pnas_0506426102_1.pdf]

# A

8 clones

4 1 1 1 1

AAAAATTTTCAGAATCAAATGATTGTAGAAACACATGATTTCTGGTTCAGAATTCACACA  
 +1  
 CTCCACCCAAAAAATACCCTTAAAAAGTTATAATTGTATTGATTAGCTGATAAAATCAA

17 clones

1 2 7 3 1 2 1

TTTATTGGAAAGAAATCCTAATAAAACGCTGTAATAGAAGAGAAGAGAAGAGAGAGGGGA  
 +144  
 GACGTGAGATCGTGAATTATG  
 +199

# B

TGATGATCTCGAGCGGCTATATATCGGTTAGAAATAGATGTTATCATAGGCATATATAAC  
 \*

TTTTACCAGAGCTACATATTAGCATATATGATCGACACCTACAATTTCTCGAAAGAGAAA  
 AAAGGATGCTGAAAACCTAAACCTTAAACCATAGATTTTGGAGCGGAGAGCTTTCGGCAA

AGTTCTCTTCGATTGCTCTTCTGAATTTCTGAATATAAGTATATGTTTACTTGTACTTGA

11 clones  
 6 1 2 2  
 ↓ ↓ ↓ ↓

4/4 clones  
 ↓  
 TGAACCCATAGCATGATAGGCTCCAAAAATATAGTTTACTC(A)n

# C

AGGATATATTCAATTGTAAATGGCTTCATGTCCGGGAAATCTACATGGATCAGCAATGAG  
 R I Y S I V N G F M S G K S T W I S N E  
 1605

TATGATGGTCAATATGGAGAAAAAGAAAGAGTAATTACCAATTTTTTTTTCAATTCAAAAA  
 Y D G Q Y G E K E R V I T N F F S I Q K

TGTAGATGTCCGCAGCGTTATTATAAAATGAAAGTACATTTTGATAAAACGACAAATTAC  
 C R C P Q R Y Y K M K V H F D K T T N Y

7 clones  
 5 2  
 ↓ ↓

GATCCGTCTGATTTTATAGCGGAAAGCAATAAACAAATTATTCTAAATTCGG(A)n  
 D P S Y L \*  
 1669
